# Supplementary material for: Exploring simvastatin, an antihyperlipidemic drug, as a potential topical antibacterial agent
Source: PubMed Central journal article supplement (PMC4639749; doi:10.1038/srep16407), 2015-11-10

**Supplementary materials**

**Exploring simvastatin, an antihyperlipidemic drug, as a potential topical  
antibacterial agent**

**Shankar Thangamani<sup>1</sup>, Haroon Mohammad<sup>1</sup>, Mostafa Abushahba<sup>1</sup>, Maha Hamed<sup>1</sup>, Tiago  
Sobreira<sup>2</sup>, Victoria Hedrick<sup>2</sup>, Lake Paul<sup>2</sup> and Mohamed Seleem<sup>1\*</sup>**

### **Supplementary methods:**

**ATP release assay:** In order to determine if simvastatin and control antibiotics were capable of disrupting the MRSA cell membrane, MRSA USA300 cells were treated with 5 × MIC of simvastatin, tetracycline, or lysostaphin for one hour at 37°C. DMSO was used as a negative control. Bacteria were centrifuged and supernatants were analyzed using the Enliten ATP Assay System (Promega) per the manufacturer's instructions. Aliquots (10 µl) of supernatant were mixed with 75 µl of luciferase assay reagent and the intensity of luminescence was recorded using a microplate reader (FLx800 BioTek Instruments, Inc. Winooski, Vermont).

**Electron Microscopy:** An overnight culture of MRSA USA300 was diluted ( $OD_{600} = 0.3$ ) and incubated with 5 × MIC of simvastatin before samples were subsequently collected at two time points (0 and 12 hours). Samples were centrifuged and the bacterial pellets were fixed with 2.5% buffered glutaraldehyde for one hour. Cells were next treated with 1% osmium tetroxide and 1% uranyl acetate. Further dehydration was done using ethanol and embedded in white resin. The samples were stained with 1% uranyl acetate and lead citrate prior to viewing samples under a Philips CM-100 microscope

### **Supplementary figure legends:**

**Supplementary figure S1.** Simvastatin does not disrupt the cell membrane of *S. aureus*. (A) MRSA USA300 cells were treated with 5 × MIC of simvastatin, tetracycline or lysostaphin and the level of ATP was measured in the supernatant for each treatment condition. (B) Transmission electron microscopy (TEM) images of untreated and simvastatin (5 × MIC) treated MRSA USA300 cells at the indicated time points, in hours (h), are shown.

**Supplementary Table S1: Screening statins for antibacterial activity**

| Statins/<br>Molecular formula                                                                                  | Pub<br>Chem ID | M.wt   | InChIKey                               | MRSA<br>ATCC 4330<br>(µg/ml) | <i>P. aeruginosa</i><br>ATCC 15442<br>(µg/ml) |
|----------------------------------------------------------------------------------------------------------------|----------------|--------|----------------------------------------|------------------------------|-----------------------------------------------|
| Simvastatin<br>C <sub>25</sub> H <sub>38</sub> O <sub>5</sub>                                                  | 54454          | 418.56 | RYMZZMVNJR<br>MUD<br>DHGQWONQESA-<br>N | 32                           | >1024                                         |
| Atorvastatin<br>C <sub>33</sub> H <sub>35</sub> FN <sub>2</sub> O <sub>5</sub>                                 | 60823          | 558.63 | XUKUURHRX<br>DUEB<br>CKAYWLYCHSA-N     | >1024                        | >1024                                         |
| Fluvastatin<br>C <sub>24</sub> H <sub>26</sub> FNO <sub>4</sub>                                                | 446155         | 411.46 | FJLGEFLZQ<br>AZZCD<br>MCBHFWOFS<br>A-N | >1024                        | >1024                                         |
| Lovastatin<br>C <sub>24</sub> H <sub>36</sub> O <sub>5</sub>                                                   | 53232          | 404.53 | PCZOHLXU<br>XFIOCF<br>BXMDZJJMS<br>A-N | >1024                        | >1024                                         |
| Mevastatin<br>C <sub>23</sub> H <sub>34</sub> O <sub>5</sub>                                                   | 64715          | 390.51 | AJLFOPYR<br>IVGYMJI<br>NTXDZFKSA-N     | >1024                        | >1024                                         |
| Pitavastatin<br>C <sub>25</sub> H <sub>24</sub> FNO <sub>4</sub>                                               | 5282452        | 421.46 | VGYFMXB<br>ACGZSI<br>LMCBHFWOFS<br>A-N | >1024                        | >1024                                         |
| Pravastatin<br>C <sub>23</sub> H <sub>36</sub> O <sub>7</sub>                                                  | 54687          | 424.52 | TUZYXOIX<br>SAXUG<br>OPZAWKZKUS<br>A-N | >1024                        | >1024                                         |
| Rosuvastatin<br>C <sub>44</sub> H <sub>54</sub> CaF <sub>2</sub> N <sub>6</sub> O <sub>12</sub> S <sub>2</sub> | 5282455        | 1001.1 | LALFOYNT<br>GMUKG<br>GBGRFNVSISA-L     | >1024                        | >1024                                         |

**Supplementary Table S2: MIC of simvastatin against *Staphylococcus* spp.**

| Strain type                                     | Strain ID                  | Phenotypic properties                                                                                      | MIC/MBC (µg/ml) |
|-------------------------------------------------|----------------------------|------------------------------------------------------------------------------------------------------------|-----------------|
| Methicillin-sensitive <i>S. aureus</i> (MSSA)   | ATCC 6538                  | Quality control and biofilm-forming strain                                                                 | 32/ >128        |
|                                                 | RN4220                     |                                                                                                            | 32/ >128        |
|                                                 | NRS72                      | Resistant to penicillin                                                                                    | 32/ >128        |
|                                                 | NRS77                      |                                                                                                            | 32/ >128        |
|                                                 | NRS846                     |                                                                                                            | 32/ >128        |
|                                                 | NRS860                     |                                                                                                            | 32/ >128        |
| Methicillin resistant <i>S. aureus</i> (MRSA)   | USA100                     | Resistant to ciprofloxacin, clindamycin, erythromycin                                                      | 32/ >128        |
|                                                 | USA200                     | Resistant to clindamycin, methicillin, erythromycin, gentamicin,                                           | 32/ >128        |
|                                                 | USA300                     | Resistant to erythromycin, methicillin, tetracycline                                                       | 32/ >128        |
|                                                 | USA400                     | Resistant to methicillin, tetracycline                                                                     | 32/ >128        |
|                                                 | USA500                     | Resistant to ciprofloxacin, clindamycin, erythromycin, gentamicin, methicillin, tetracycline, trimethoprim | 32/ >128        |
|                                                 | USA700                     | Resistant to erythromycin, methicillin                                                                     | 32/ >128        |
|                                                 | USA800                     | Resistant to methicillin                                                                                   | 32/ >128        |
|                                                 | USA1000                    | Resistant to erythromycin, methicillin                                                                     | 32/ >128        |
|                                                 | USA1100                    | Resistant to methicillin                                                                                   | 32/ >128        |
|                                                 | NRS194                     | Resistant to methicillin                                                                                   | 64/ >128        |
|                                                 | NRS108                     | Resistant to gentamicin                                                                                    | 32/ >128        |
|                                                 | NRS119 (Lin <sup>r</sup> ) | Resistant to linezolid                                                                                     | 32/ >128        |
|                                                 | ATCC 43300                 | Resistant to methicillin                                                                                   | 32/ >128        |
|                                                 | ATCC BAA-44                | Multidrug-resistant strain                                                                                 | 32/ >128        |
|                                                 | NRS70                      | Resistant to erythromycin, clindamycin, spectinomycin                                                      | 32/ >128        |
|                                                 | NRS71                      | Resistant to tetracycline, methicillin                                                                     | 32/ >128        |
|                                                 | NRS100                     | Resistant to tetracycline, methicillin                                                                     | 64/ >128        |
|                                                 | NRS123                     | Resistant to tetracycline, methicillin                                                                     | 32/ >128        |
| Vancomycin-intermediate <i>S. aureus</i> (VISA) | NRS1                       | Resistant to aminoglycosides and tetracycline; glycopeptide-intermediate <i>S. aureus</i>                  | 32/ >128        |
|                                                 | NRS19                      | Glycopeptide-intermediate <i>S. aureus</i>                                                                 | 32/ >128        |
|                                                 | NRS37                      | Glycopeptide-intermediate <i>S. aureus</i>                                                                 | 32/ >128        |
| Vancomycin-resistant <i>S. aureus</i> (VRSA)    | VRS1                       | Resistant to vancomycin                                                                                    | 32/ >128        |
|                                                 | VRS2                       | Resistant to vancomycin, erythromycin, spectinomycin                                                       | 32/ >128        |
|                                                 | VRS3a                      | Resistant to vancomycin                                                                                    | 32/ >128        |
|                                                 | VRS3b                      | Resistant to vancomycin                                                                                    | 32/ >128        |
|                                                 | VRS4                       | Resistant to vancomycin, erythromycin, spectinomycin                                                       | 32/ >128        |
|                                                 | VRS5                       | Resistant to vancomycin                                                                                    | 32/ >128        |
|                                                 | VRS6                       | Resistant to vancomycin                                                                                    | 32/ >128        |
|                                                 | VRS7                       | Resistant to vancomycin, β-lactams                                                                         | 32/ >128        |
|                                                 | VRS8                       | Resistant to vancomycin                                                                                    | 32/ >128        |
|                                                 | VRS9                       | Resistant to vancomycin                                                                                    | 64/ >128        |
|                                                 | VRS10                      | Resistant to vancomycin                                                                                    | 32/ >128        |
|                                                 | VRS11a                     | Resistant to vancomycin                                                                                    | 32/ >128        |
|                                                 | VRS11b                     | Resistant to vancomycin                                                                                    | 32/ >128        |
| VRS12                                           | Resistant to vancomycin    | 32/ >128                                                                                                   |                 |
| VRS13                                           | Resistant to vancomycin    | 32/ >128                                                                                                   |                 |
| <i>S. epidermidis</i>                           | NRS101                     | Prototype biofilm producer; resistant to methicillin, gentamicin                                           | 32/ >128        |

**Supplementary Table S3: MIC of simvastatin against *Enterococcus*, *Listeria*, *Streptococcus* and *Bacillus* spp.**

| Strain ID                           | Phenotypic Characteristics                                                                      | MIC/MBC (µg/ml) |
|-------------------------------------|-------------------------------------------------------------------------------------------------|-----------------|
| <i>E. faecalis</i> ATCC49533        | Resistant to streptomycin                                                                       | 32/ >128        |
| <i>E. faecalis</i> ATCC7080         | -                                                                                               | 32/ >128        |
| <i>E. faecalis</i> ATCC49532        | Resistant to gentamicin                                                                         | 32/ >128        |
| <i>E. faecalis</i> ATCC14506        | -                                                                                               | 32/ >128        |
| <i>E. faecalis</i> ATCC 51229 (VRE) | Resistant to Vancomycin. Sensitive to Teicoplanin                                               | 32/ >128        |
| <i>E. faecalis</i> SF24397          | Resistant to erythromycin (ermB+) and gentamicin                                                | 32/ >128        |
| <i>E. faecalis</i> SF24413 (VRE)    | Resistant to erythromycin, gentamicin and vancomycin.                                           | 32/ >128        |
| <i>E. faecalis</i> SF28073 (VRE)    | Resistant to erythromycin, gentamicin and vancomycin                                            | 32/ >128        |
| <i>E. faecalis</i> HH22             | Resistant to penicillin, erythromycin, tetracycline and high levels of aminoglycosides          | 32/ >128        |
| <i>E. faecalis</i> MMH594           | Resistant to erythromycin and gentamicin                                                        | 32/ >128        |
| <i>E. faecalis</i> SV587 (VRE)      | Resistant to vancomycin                                                                         | 32/ >128        |
| <i>E. faecium</i> E1162             | Resistant to ampicillin                                                                         | 32/ >128        |
| <i>E. faecium</i> E0120 (VRE)       | Resistant to gentamicin and vancomycin                                                          | 32/ >128        |
| <i>E. faecium</i> ERV102 (VRE)      | Resistant to ampicillin and vancomycin, and displays high levels of resistance to streptomycin. | 32/ >128        |
| <i>E. faecium</i> ATCC6569          | -                                                                                               | 32/ >128        |
| <i>E. faecium</i> ATCC 700221 (VRE) | Resistant to vancomycin and teicoplanin                                                         | 32/ >128        |
| <i>L. monocytogenes</i> F4244       |                                                                                                 | 32/ >128        |
| <i>L. monocytogenes</i> J0161       | β-hemolytic, slow rhamnose fermenter                                                            | 32/ >128        |
| <i>L. monocytogenes</i> ATCC 13932  | β-hemolytic                                                                                     | 32/ >128        |
| <i>L. monocytogenes</i> ATCC 19112  | β-hemolytic                                                                                     | 32/ >128        |
| <i>L. monocytogenes</i> ATCC 19111  | β-hemolytic                                                                                     | 32/ >128        |
| <i>L. monocytogenes</i> ATCC 19114  | β-hemolytic                                                                                     | 32/ >128        |
| <i>S. pneumoniae</i> 51916          | Resistant to cephalosporins                                                                     | 64/ >128        |
| <i>S. pneumoniae</i> 70677          | Resistant to erythromycin, penicillin, and tetracycline                                         | 64/ >128        |
| <i>Bacillus anthracis</i>           | Stern vaccine strain                                                                            | 16/64           |
| <i>B. anthracis</i> UM23            | Weybridge strain                                                                                | 16/64           |
| <i>B. anthracis</i> AMES35          | Isolated from 14-month-old heifer that died in Texas in 1981.                                   | 16/64           |

Supplementary Figure S1

a)

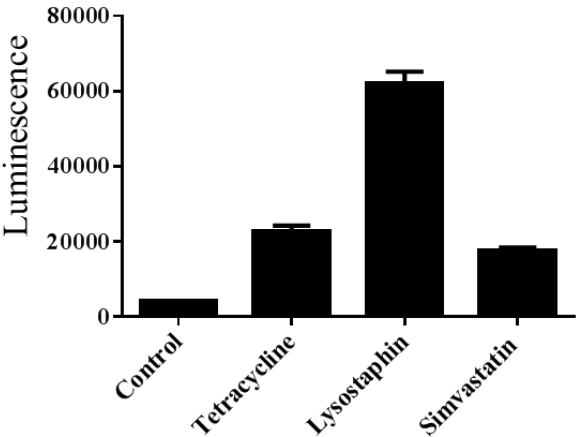

b)

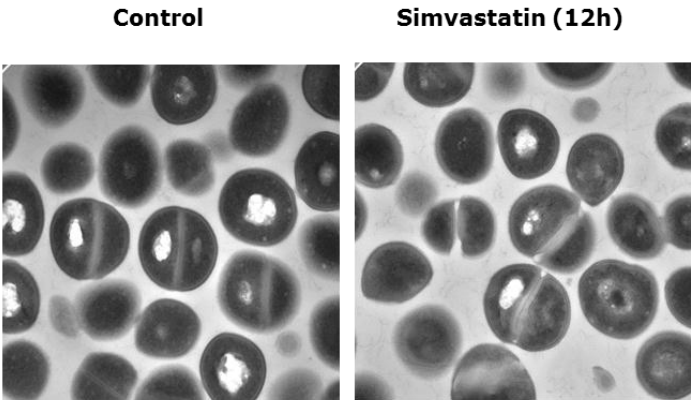

Supplement: srep16407-s1.pdf [file srep16407-s1.pdf]
